# Supplementary material
Source: MDPI journal article supplement (https://www.mdpi.com/2543-6031/90/6/55)
Supplement: s1 [file s1]

## SUPPLEMENTARY MATERIAL

- The original figures of invasive right and left pulmonary artery pressure measurements at catheter laboratory and at intensive care unit using EKOS drug delivery catheter are redesigned using Digitizelt program version 2.5.10.

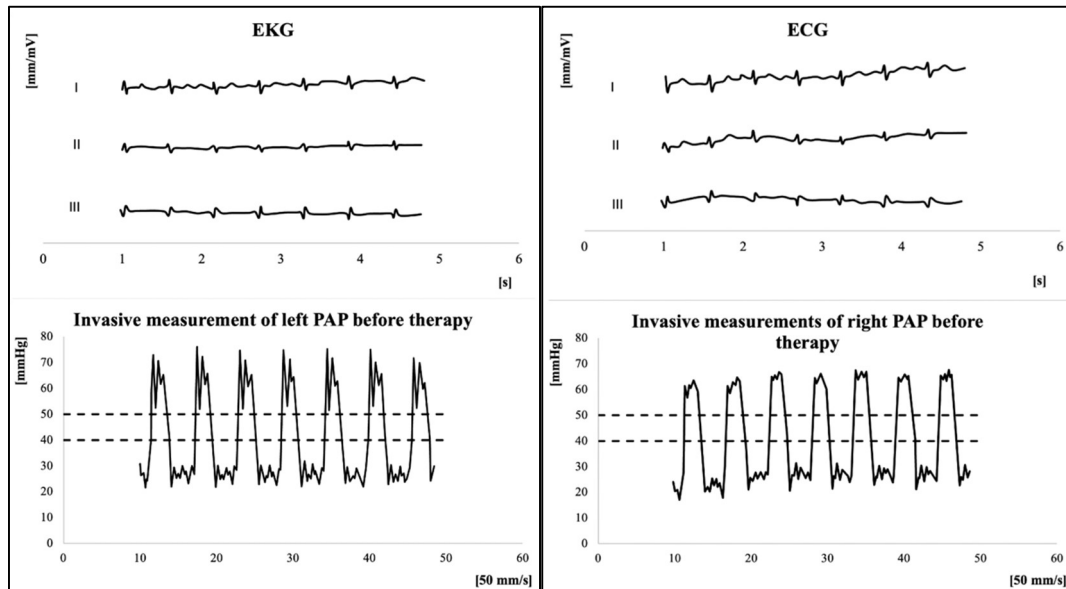

Figure S1: Right and left pulmonary artery pressure measurement respectively before therapy initiation

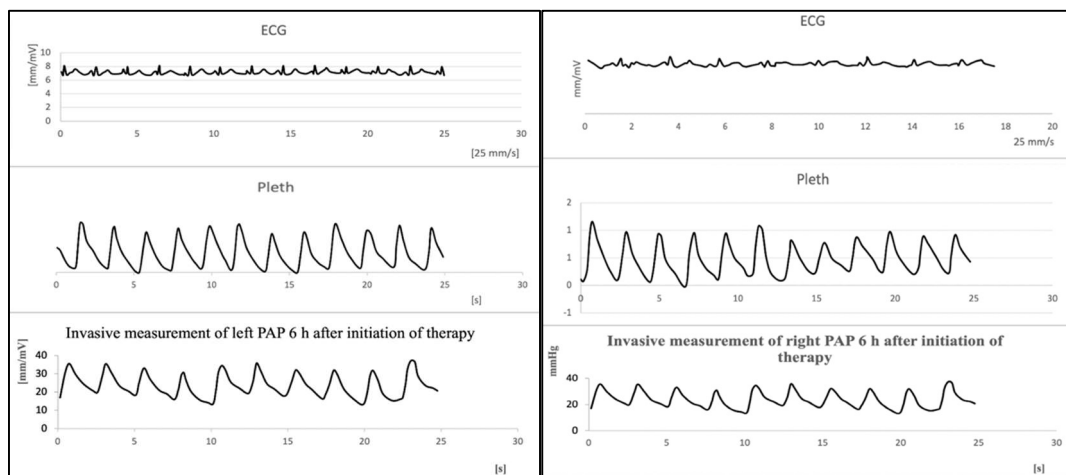

Figure S2: Right and left pulmonary artery pressure measurement respectively 6h after therapy initiation at ICU.
